# Supplementary material
Source: Springer Nature journal article supplement (https://www.springermedizin.de/resource/supplementary/12884_2013_710_MOESM1_ESM.pdf/9458530)

>

# Preeclampsia

- Follow-up treatment and long term risks -

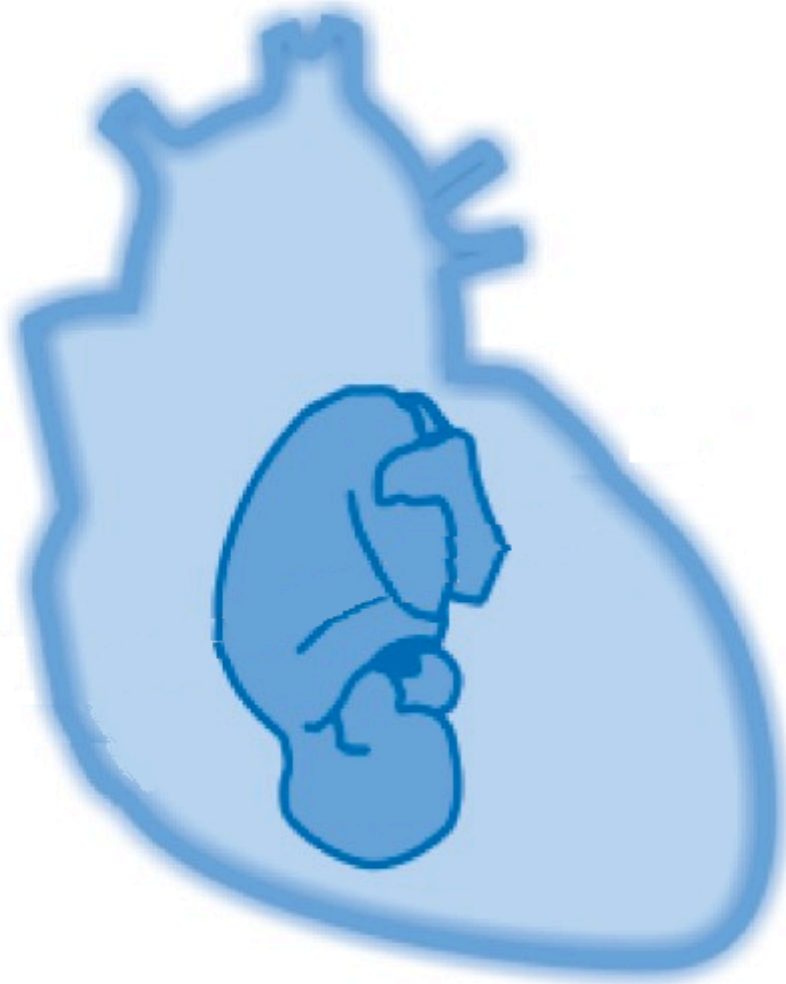

## Survey

1. Years of your clinical experience?

- < 5 years     6-11 years     11-20 years     >21 years

2. Your sex

- male     female

3. Average age of patients you treat

- 20-40 years     40-50 years     >50 years

4. Proportion of treated patients > 50 years

- < 10 %     11-30%     31-50%     > 51%

5. When you perform routine counseling for cardiovascular risk reduction, you

5.1. give instructions for lifestyle change (weight-reduction)

5.2. counsel on self-help-groups

5.3. counsel on routinely blood-pressure measurement

6. You perform routine counseling for cardiovascular risk reduction on patients >50 years

|                                                                                           | Definitely do         | May do                | Hardly do             | Definitely don't do   |
|-------------------------------------------------------------------------------------------|-----------------------|-----------------------|-----------------------|-----------------------|
| 5.1. give instructions for lifestyle change (weight-reduction)                            | <input type="radio"/> | <input type="radio"/> | <input type="radio"/> | <input type="radio"/> |
| 5.2. counsel on self-help-groups                                                          | <input type="radio"/> | <input type="radio"/> | <input type="radio"/> | <input type="radio"/> |
| 5.3. counsel on routinely blood-pressure measurement                                      | <input type="radio"/> | <input type="radio"/> | <input type="radio"/> | <input type="radio"/> |
| 6. You perform routine counseling for cardiovascular risk reduction on patients >50 years | <input type="radio"/> | <input type="radio"/> | <input type="radio"/> | <input type="radio"/> |

7. Your patient-history contains

7.1. a history of preeclampsia

7.2. a family history of preeclampsia

7.3. hypertension before pregnancy

8. Do you ask for a history of preeclampsia on non-pregnant women?

9. Do you inform your patients about the meaning and importance of preeclampsia and the possible long-term effects?

10. Do you ask patients with a history of preeclampsia for the time of occurrence of preeclampsia?

|                                                                                                                     | Always                | Often                 | Rarely                | Never                 |
|---------------------------------------------------------------------------------------------------------------------|-----------------------|-----------------------|-----------------------|-----------------------|
| 7.1. a history of preeclampsia                                                                                      | <input type="radio"/> | <input type="radio"/> | <input type="radio"/> | <input type="radio"/> |
| 7.2. a family history of preeclampsia                                                                               | <input type="radio"/> | <input type="radio"/> | <input type="radio"/> | <input type="radio"/> |
| 7.3. hypertension before pregnancy                                                                                  | <input type="radio"/> | <input type="radio"/> | <input type="radio"/> | <input type="radio"/> |
| 8. Do you ask for a history of preeclampsia on non-pregnant women?                                                  | <input type="radio"/> | <input type="radio"/> | <input type="radio"/> | <input type="radio"/> |
| 9. Do you inform your patients about the meaning and importance of preeclampsia and the possible long-term effects? | <input type="radio"/> | <input type="radio"/> | <input type="radio"/> | <input type="radio"/> |
| 10. Do you ask patients with a history of preeclampsia for the time of occurrence of preeclampsia?                  | <input type="radio"/> | <input type="radio"/> | <input type="radio"/> | <input type="radio"/> |

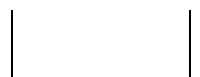

|                                                                                                                                   | Always                | Often                 | Rarely                | Never                 |
|-----------------------------------------------------------------------------------------------------------------------------------|-----------------------|-----------------------|-----------------------|-----------------------|
| 11. Do you typically counsel on the following points during your follow-up management of patients with a history of preeclampsia? |                       |                       |                       |                       |
| 11.1. regularly blood pressure-measurement 3 month after delivery                                                                 | <input type="radio"/> | <input type="radio"/> | <input type="radio"/> | <input type="radio"/> |
| 11.2. evaluation of kidney-disease 3 month after delivery                                                                         | <input type="radio"/> | <input type="radio"/> | <input type="radio"/> | <input type="radio"/> |
| 11.3. ascertainment of serum creatinine and proteinuria                                                                           | <input type="radio"/> | <input type="radio"/> | <input type="radio"/> | <input type="radio"/> |
| 11.4. counseling on the elevated risk of the development of cardiovascular diseases later in life                                 | <input type="radio"/> | <input type="radio"/> | <input type="radio"/> | <input type="radio"/> |
| 11.5. information about the regular follow-up treatment of the newborn child                                                      | <input type="radio"/> | <input type="radio"/> | <input type="radio"/> | <input type="radio"/> |
| 12. Do you counsel about the elevated risk of the development of cardiovascular disease later in life?                            | <input type="radio"/> | <input type="radio"/> | <input type="radio"/> | <input type="radio"/> |

|                                                                                                                                 | Very well             | Well                  | Less well             | Not at all            |
|---------------------------------------------------------------------------------------------------------------------------------|-----------------------|-----------------------|-----------------------|-----------------------|
| 13. How familiar are you with the elevated risk of women with a history of preeclampsia to develop the following diseases?      |                       |                       |                       |                       |
| 13.1. malignancies                                                                                                              | <input type="radio"/> | <input type="radio"/> | <input type="radio"/> | <input type="radio"/> |
| 13.2. hypertension                                                                                                              | <input type="radio"/> | <input type="radio"/> | <input type="radio"/> | <input type="radio"/> |
| 13.3. stroke                                                                                                                    | <input type="radio"/> | <input type="radio"/> | <input type="radio"/> | <input type="radio"/> |
| 13.4. kidney disease                                                                                                            | <input type="radio"/> | <input type="radio"/> | <input type="radio"/> | <input type="radio"/> |
| 13.5. liver disease                                                                                                             | <input type="radio"/> | <input type="radio"/> | <input type="radio"/> | <input type="radio"/> |
| 14. How familiar are you with the current guidelines of the DGGG concerning treatment and follow-up management of preeclampsia? | <input type="radio"/> | <input type="radio"/> | <input type="radio"/> | <input type="radio"/> |

|                                                                                       | Definitely applies    | May apply             | Probably doesn't apply | Definitely doesn't apply |
|---------------------------------------------------------------------------------------|-----------------------|-----------------------|------------------------|--------------------------|
| 15. Do you think women with a history of preeclampsia have a shorter life expectancy? | <input type="radio"/> | <input type="radio"/> | <input type="radio"/>  | <input type="radio"/>    |

|                                                                                 | Very much             | Much                  | Not much              | Not at all            |
|---------------------------------------------------------------------------------|-----------------------|-----------------------|-----------------------|-----------------------|
| 16. How much are you interested in further education on the topic preeclampsia? | <input type="radio"/> | <input type="radio"/> | <input type="radio"/> | <input type="radio"/> |

Thank you for your cooperation

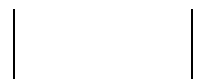

Supplement: MOESM1 [file 9458530]
